# Supplementary material for: NaYF4:Yb3+(58%),Tm3+@NaYF4@Au nanocomposite for 4-nitrophenol ultrasensitive quantitative detection and highly efficient catalytic reduction
Source: Royal Society of Chemistry journal article supplement (doi:10.1039/d2nj00740a), 2022-01-01
Supplement: d2nj00740a1.pdf [file d2nj00740a1.pdf]

## Supporting Information

$\text{NaYF}_4:\text{Yb}^{3+}(58\%),\text{Tm}^{3+}@NaYF_4@Au$

Nanocomposite for 4-Nitrophenol Ultrasensitive  
Quantitative Detection and Highly Efficient  
Catalytic Reduction

*Xia Xu,<sup>\*a</sup> Meirong Fu,<sup>a</sup> Min Yang,<sup>a</sup> Bing Hu,<sup>a</sup> Wenjun Gui,<sup>a</sup> Jitao Yang<sup>a</sup> and Jinxiu Guo<sup>a</sup>*

<sup>a</sup> College of Science, Gansu Agricultural University, Lanzhou 730070, P. R. China.

E-mail: xuxia@gsau.edu.cn (Dr. X. Xu)

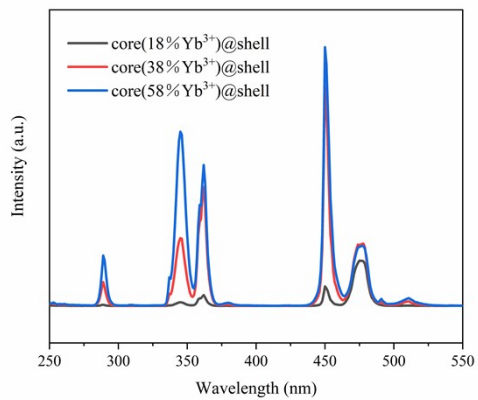

**Fig. S1** Upconversion luminescence spectra of core(18% Yb<sup>3+</sup>)@shell, core(38% Yb<sup>3+</sup>)@shell and core(58% Yb<sup>3+</sup>)@shell nanocrystals under 980 nm excitation.

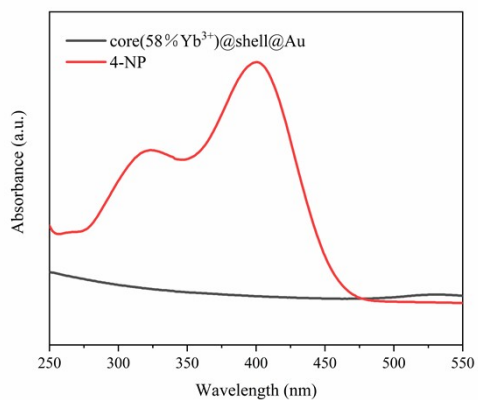

**Fig. S2** UV-visible absorption spectra of core(58% Yb<sup>3+</sup>)@shell@Au and 4-NP.

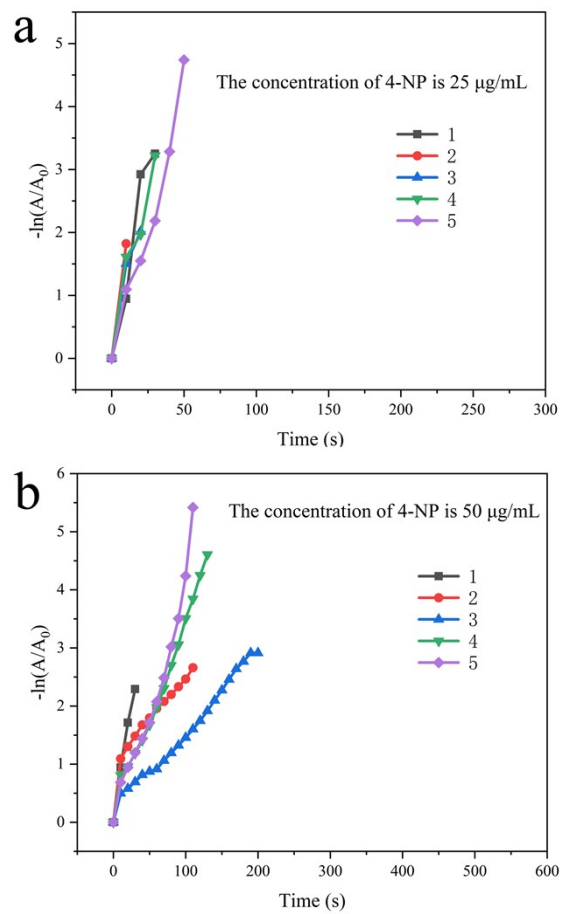

**Fig. S3** Reusability of core(58% Yb<sup>3+</sup>)@shell@Au in five cycles for catalyzing reduction 4-NP: (a) the concentration of 4-NP is 25 µg/mL, (b) the concentration of 4-NP is 50 µg/mL.
